# Supplementary material
Source: publisher figshare collection journal article supplement (https://frontiersin.figshare.com/ndownloader/files/23381753)
Supplement: Supplementary file 1 [file 23381753]

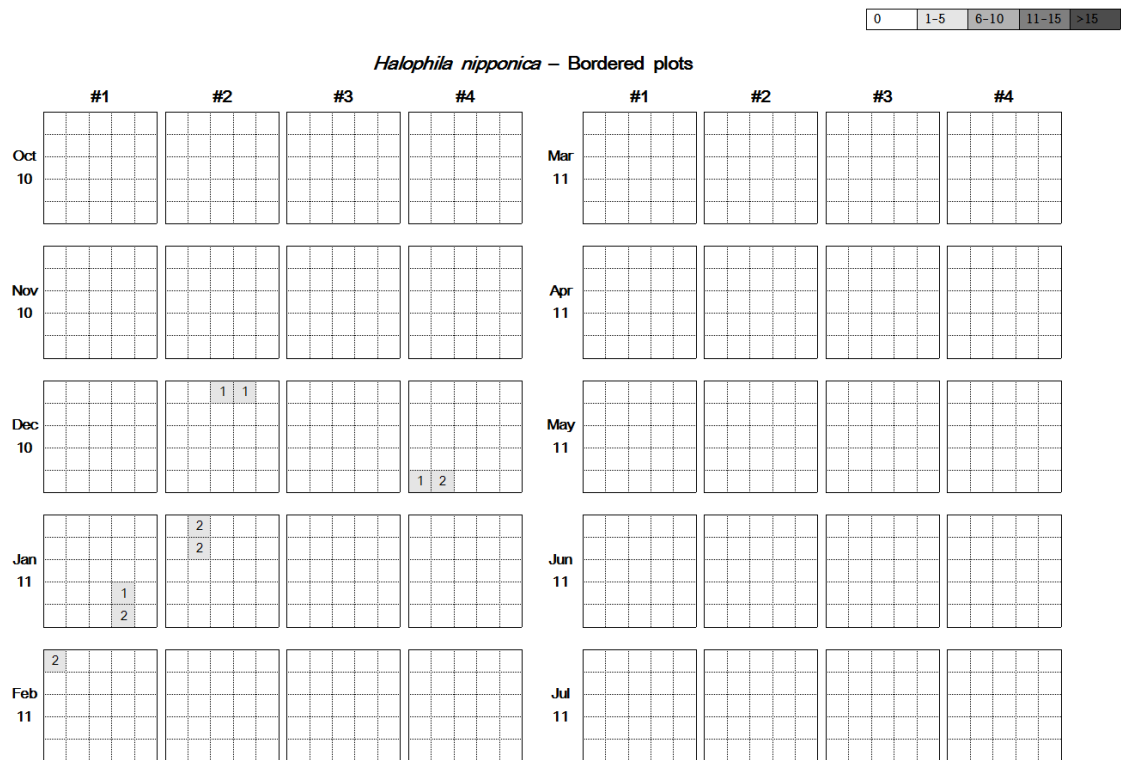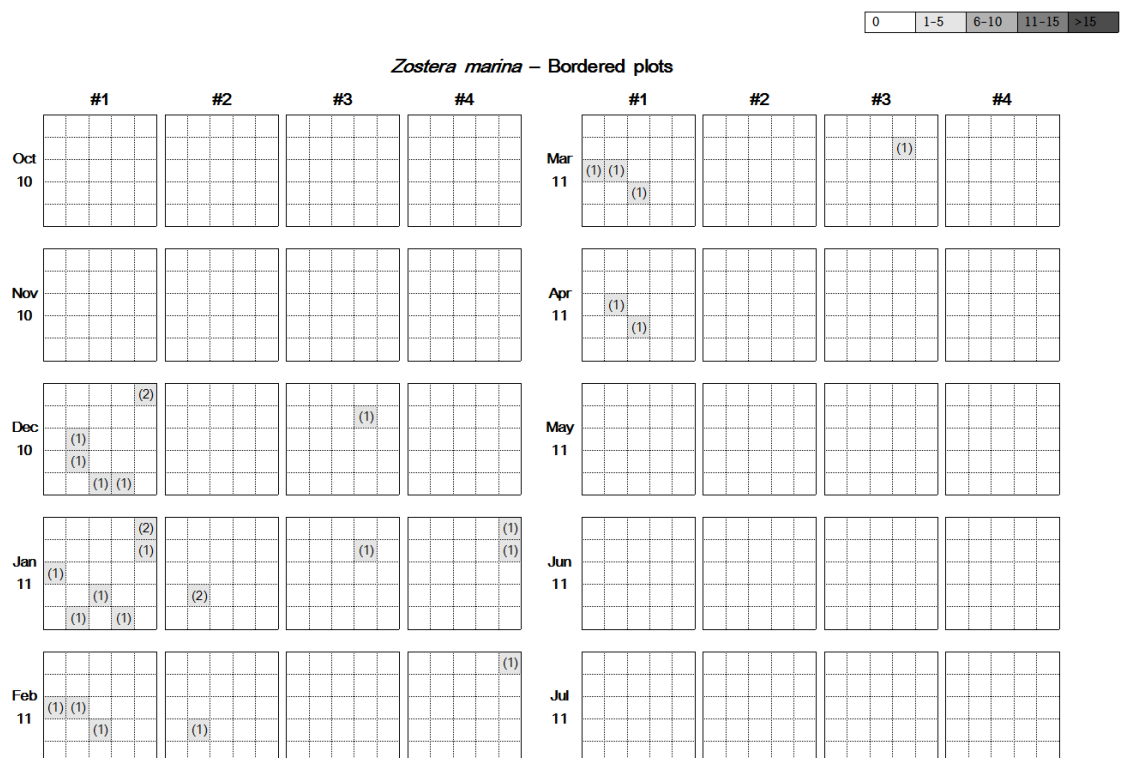

**Supplementary Figure 1.** Recolonization of *Halophila nipponica* and *Zostera marina* in the bordered gaps. Values are the numbers of vegetative shoots, and values in parentheses are the numbers of seedlings. Shading in subquadrats corresponds to shoot density in each cell.

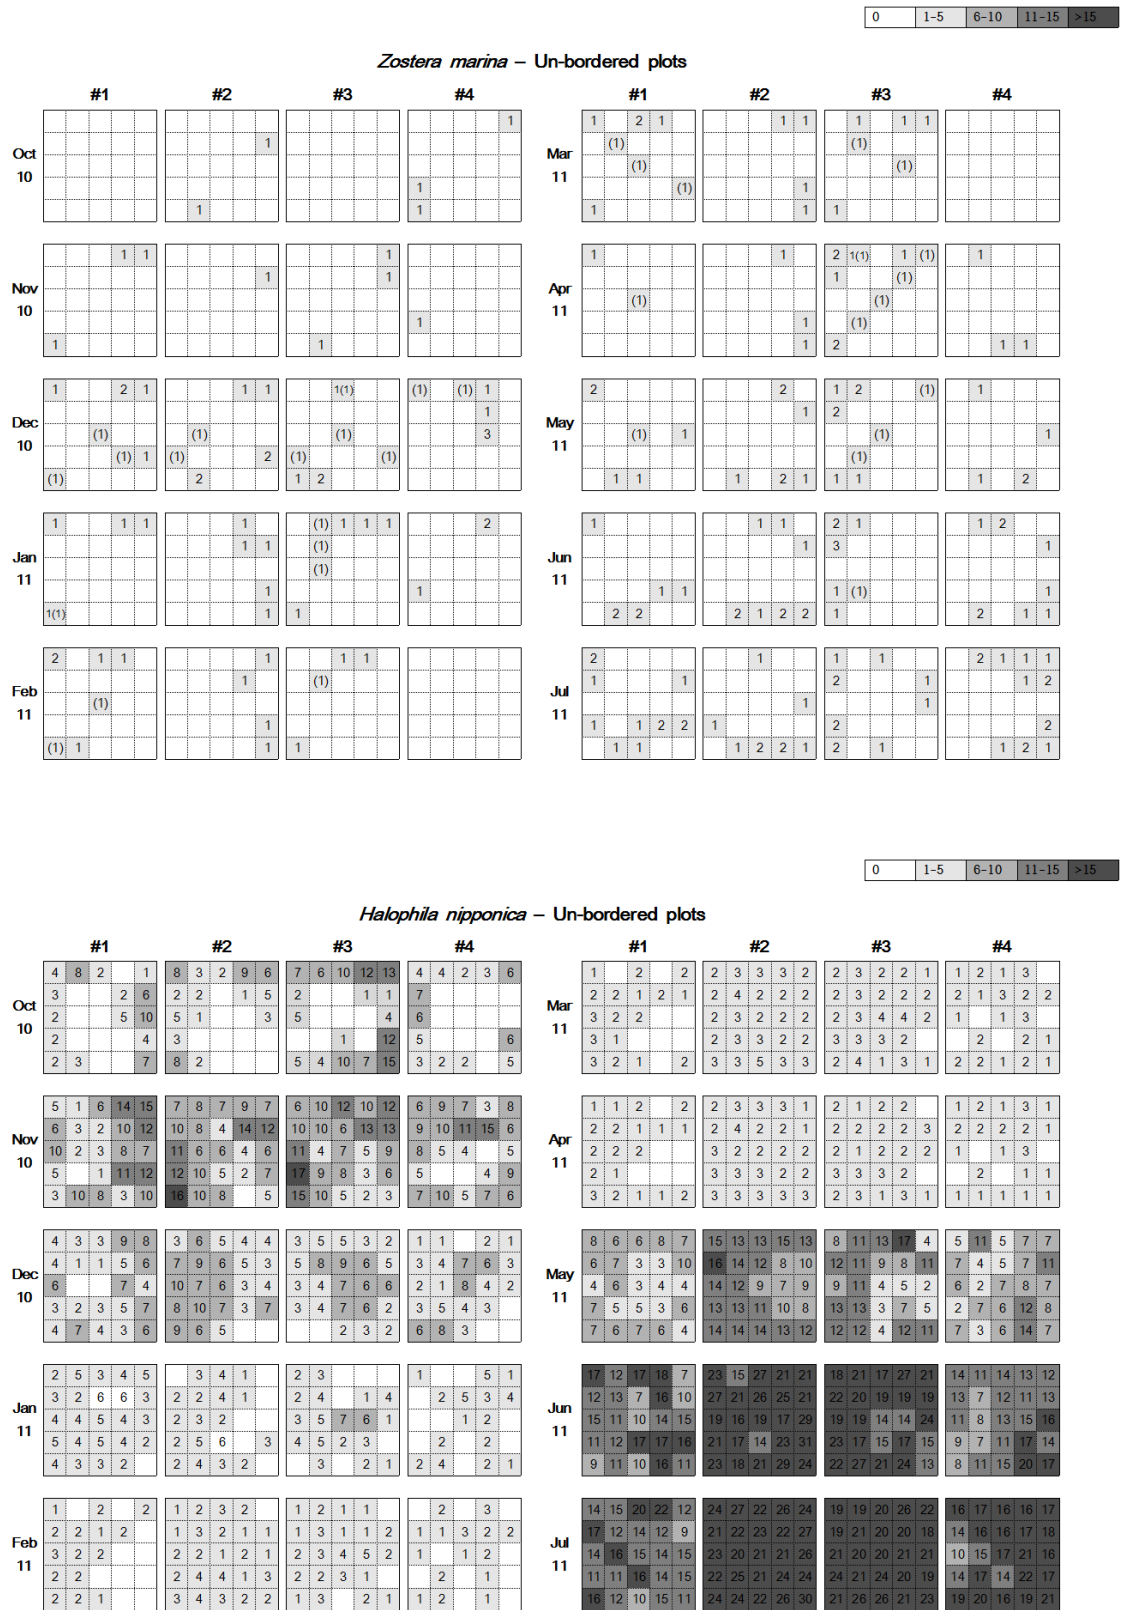

**Supplementary Figure 2.** Recolonization of *Halophila nipponica* and *Zostera marina* in the un-bordered gaps. Values are the numbers of vegetative shoots, and values in parentheses are the numbers of seedlings. Shading in subquadrats corresponds to shoot density in each cell.
